# Supplementary material for: Stepwise coordination isomerism of 2D networks: adsorption of diiodomethane into crystals and recognition in SCSC mode
Source: Royal Society of Chemistry journal article supplement (doi:10.1039/d1qi00540e), 2021-01-01
Supplement: d1qi00540e1.pdf [file d1qi00540e1.pdf]

<Electronic Supplementary Information>

**Stepwise coordination isomerism. Adsorption and recognition of CH<sub>2</sub>I<sub>2</sub> into 2D layered crystals in SCSC mode**

Junhee Kim<sup>a</sup>, Junmyeong Park<sup>a</sup>, Dongwon Kim<sup>a</sup>, Martino Di Serio<sup>b</sup> and Ok-Sang Jung<sup>a,\*</sup>

<sup>a</sup>Department of Chemistry, Pusan National University, Busan 46241, Republic of Korea Fax: (+82) 51-5163522;

Tel: (+82) 51-5103240; E-mail: [oksjung@pusan.ac.kr](mailto:oksjung@pusan.ac.kr)

<sup>b</sup>Department of Chemical Sciences, University of Naples Federico II, Naples, Italy

Electronic Supplementary Information (ESI) available: Experimental details and crystal structure determination. IR spectra of each sample (L, 3CH<sub>2</sub>Cl<sub>2</sub>·2C<sub>2</sub>H<sub>5</sub>OH@[CdI<sub>2</sub>L], 4C<sub>4</sub>H<sub>8</sub>O@[CdI<sub>2</sub>L], 3CH<sub>2</sub>I<sub>2</sub>@[CdI<sub>2</sub>L] and 3CH<sub>2</sub>Br<sub>2</sub>@[CdI<sub>2</sub>L]). TGA/DSC curves of the present Cd(II) compounds, (3CH<sub>2</sub>Cl<sub>2</sub>·2C<sub>2</sub>H<sub>5</sub>OH@[CdI<sub>2</sub>L] and 4C<sub>4</sub>H<sub>8</sub>O@[CdI<sub>2</sub>L]). Full <sup>1</sup>H NMR spectra of each sample (L, 3CH<sub>2</sub>Cl<sub>2</sub>·2C<sub>2</sub>H<sub>5</sub>OH@[CdI<sub>2</sub>L], 4C<sub>4</sub>H<sub>8</sub>O@[CdI<sub>2</sub>L], 1.3CH<sub>2</sub>Cl<sub>2</sub>·0.8C<sub>2</sub>H<sub>5</sub>OH·1.5CH<sub>2</sub>I<sub>2</sub>@[CdI<sub>2</sub>L], 0.8 CH<sub>2</sub>Cl<sub>2</sub>·0.6C<sub>2</sub>H<sub>5</sub>OH·2.5CH<sub>2</sub>Br<sub>2</sub>@[CdI<sub>2</sub>L], 3CH<sub>2</sub>I<sub>2</sub>@[CdI<sub>2</sub>L], 3CH<sub>2</sub>Br<sub>2</sub>@[CdI<sub>2</sub>L] and 3CH<sub>2</sub>Cl<sub>2</sub>@[CdI<sub>2</sub>L]). This material is available free of charge at <http://pubs.acs.org>. CCDC 2077166 - 2077169 contain the supplementary crystallographic data for this paper. These data can be obtained free of charge via [www.ccdc.cam.ac.uk/data\\_request/cif](http://www.ccdc.cam.ac.uk/data_request/cif), or by emailing [data\\_request@ccdc.cam.ac.uk](mailto:data_request@ccdc.cam.ac.uk), or by contacting The Cambridge Crystallographic Data Centre, 12 Union Road, Cambridge CB2 1EZ, UK; fax: +44 1223 336033.

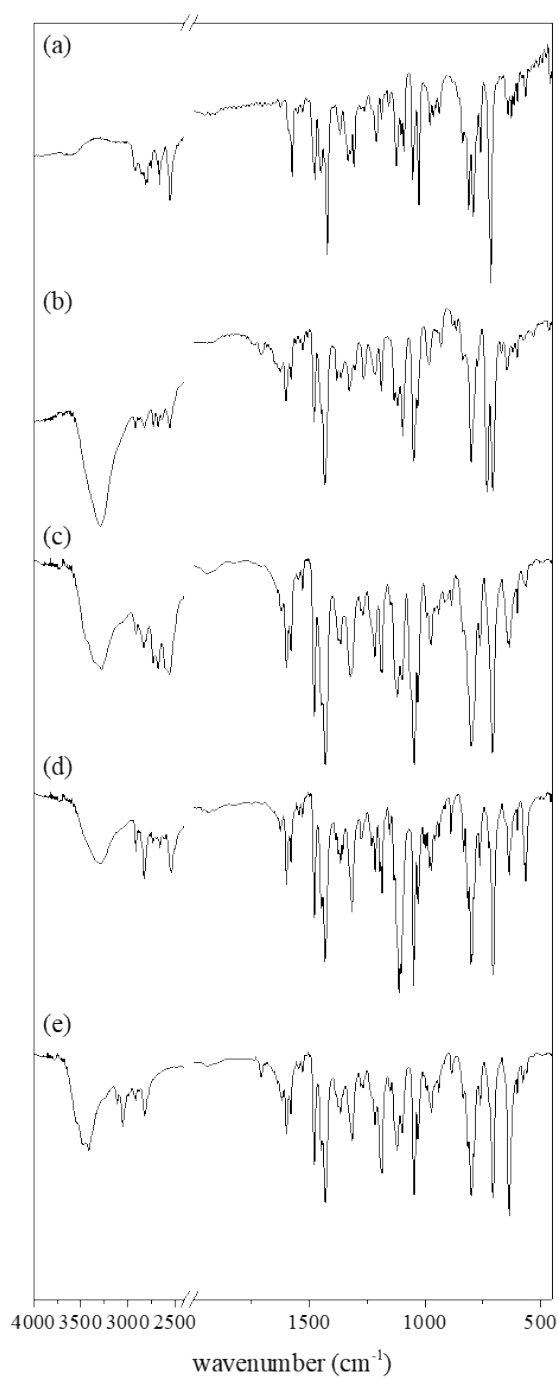

**Fig. S1** IR spectra of L (a), 3CH<sub>2</sub>Cl<sub>2</sub>·2C<sub>2</sub>H<sub>5</sub>OH@[CdI<sub>2</sub>L] (b), 4C<sub>4</sub>H<sub>8</sub>O@[CdI<sub>2</sub>L] (c), 3CH<sub>2</sub>I<sub>2</sub>@[CdI<sub>2</sub>L] (d), and 3CH<sub>2</sub>Br<sub>2</sub>@[CdI<sub>2</sub>L] (e).

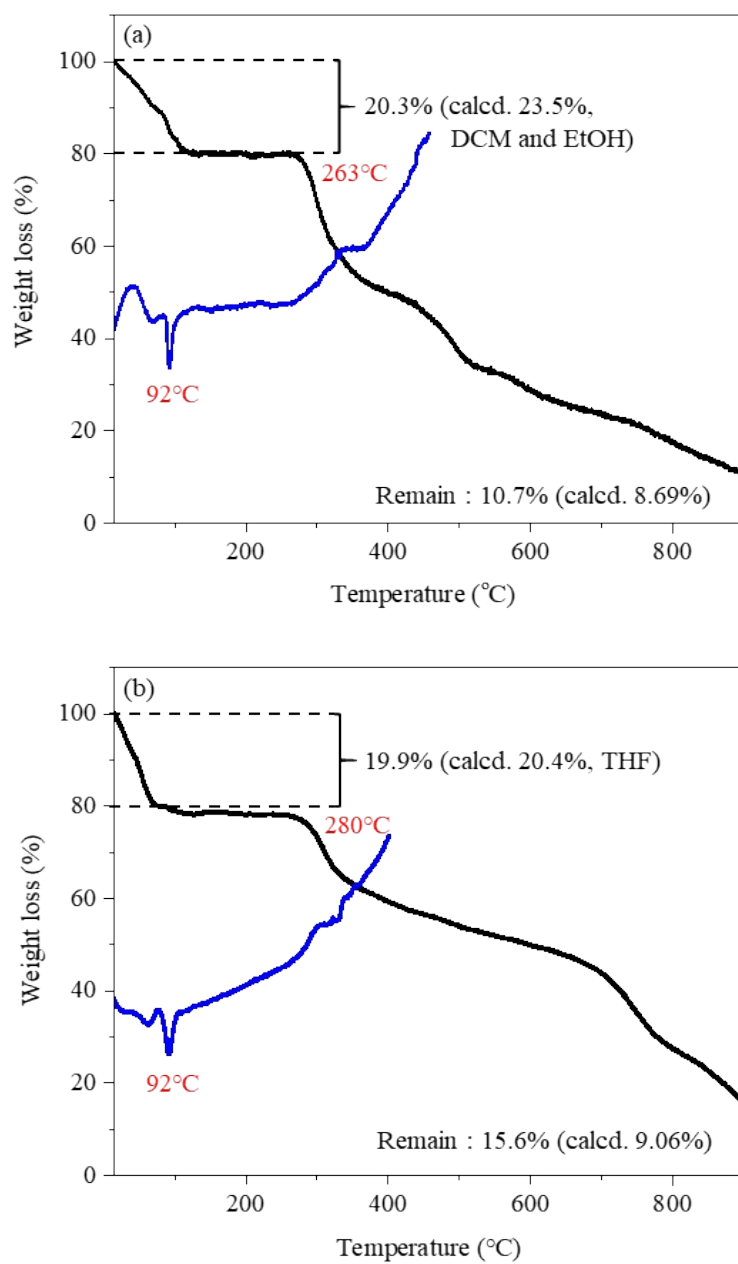

**Fig. S2** TGA and DSC overlays of  $3\text{CH}_2\text{Cl}_2 \cdot 2\text{C}_2\text{H}_5\text{OH} @ [\text{CdI}_2\text{L}]$  (a) and  $4\text{C}_4\text{H}_8\text{O} @ [\text{CdI}_2\text{L}]$  (b).

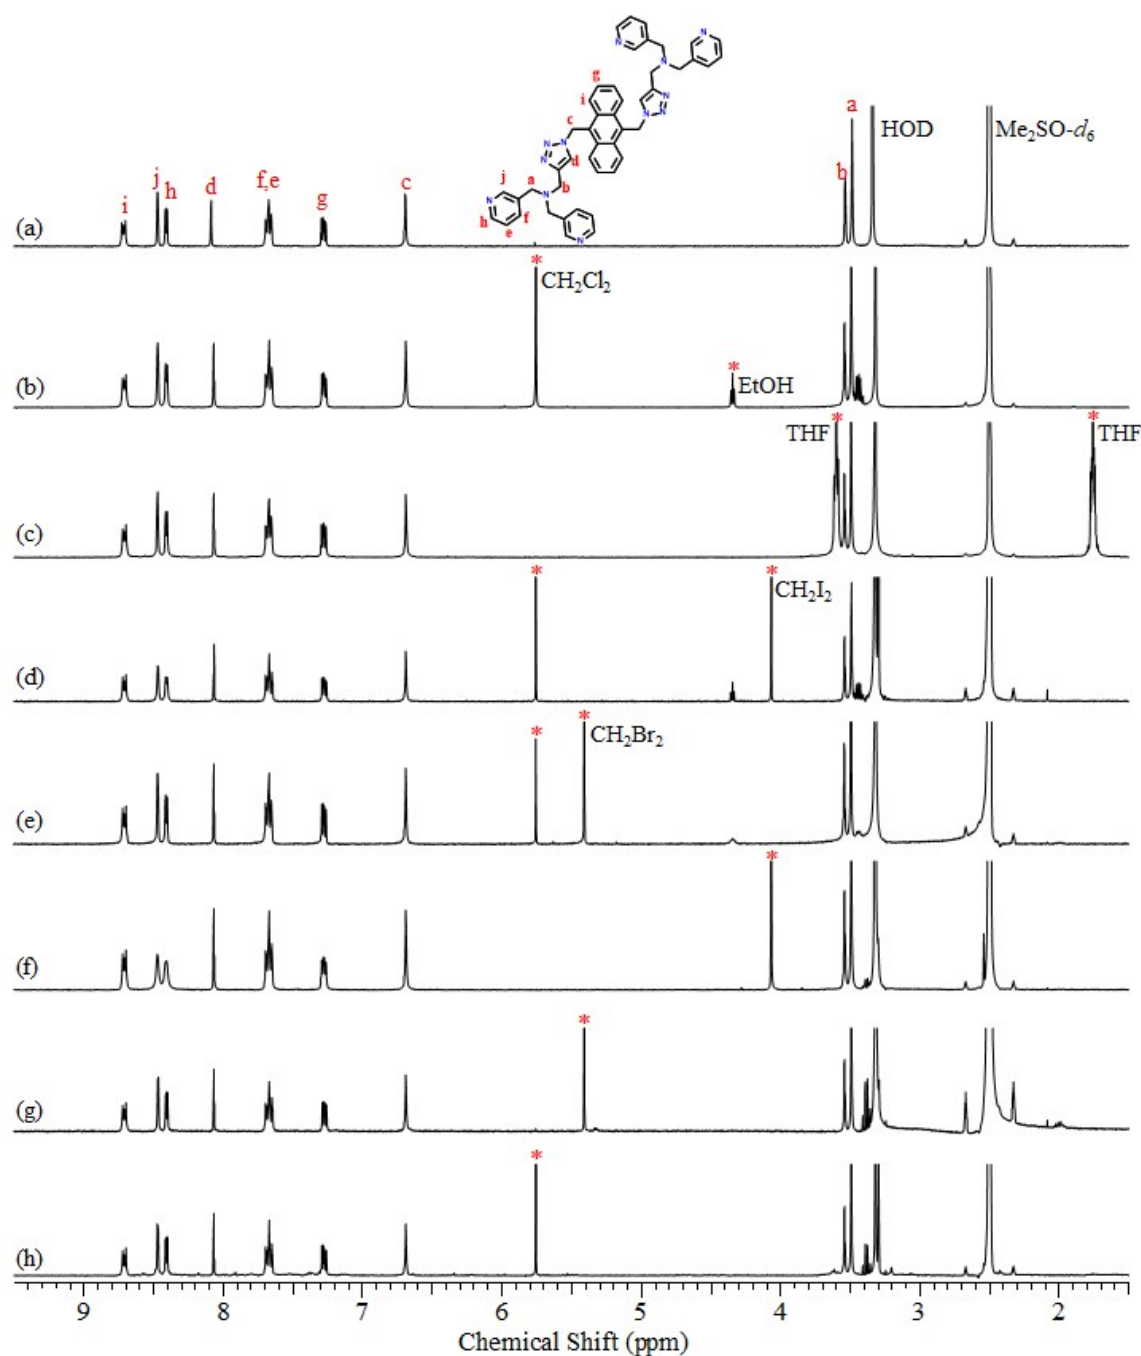

**Fig. S3**  $^1\text{H}$  NMR spectra of L (a),  $3\text{CH}_2\text{Cl}_2 \cdot 2\text{C}_2\text{H}_5\text{OH} @ [\text{CdI}_2\text{L}]$  (b),  $4\text{C}_4\text{H}_8\text{O} @ [\text{CdI}_2\text{L}]$  (c),  $1.3\text{CH}_2\text{Cl}_2 \cdot 0.8\text{C}_2\text{H}_5\text{OH} \cdot 1.5\text{CH}_2\text{I}_2 @ [\text{CdI}_2\text{L}]$  (d),  $0.8\text{CH}_2\text{Cl}_2 \cdot 0.6\text{C}_2\text{H}_5\text{OH} \cdot 2.5\text{CH}_2\text{Br}_2 @ [\text{CdI}_2\text{L}]$  (e),  $3\text{CH}_2\text{I}_2 @ [\text{CdI}_2\text{L}]$  (f),  $3\text{CH}_2\text{Br}_2 @ [\text{CdI}_2\text{L}]$  (g), and  $3\text{CH}_2\text{Cl}_2 @ [\text{CdI}_2\text{L}]$  (h) in  $\text{Me}_2\text{SO}-d_6$ . For spectra (d) and (e), solvate molecules were exchanged from  $\text{CH}_2\text{Cl}_2 \cdot 2\text{C}_2\text{H}_5\text{OH} @ [\text{CdI}_2\text{L}]$ . For spectra (f), (g), and (h), guests were exchanged from  $4\text{C}_4\text{H}_8\text{O} @ [\text{CdI}_2\text{L}]$ . After the solvate exchange, the crystals were washed with diethyl ether to wash off the solvents on the surface.

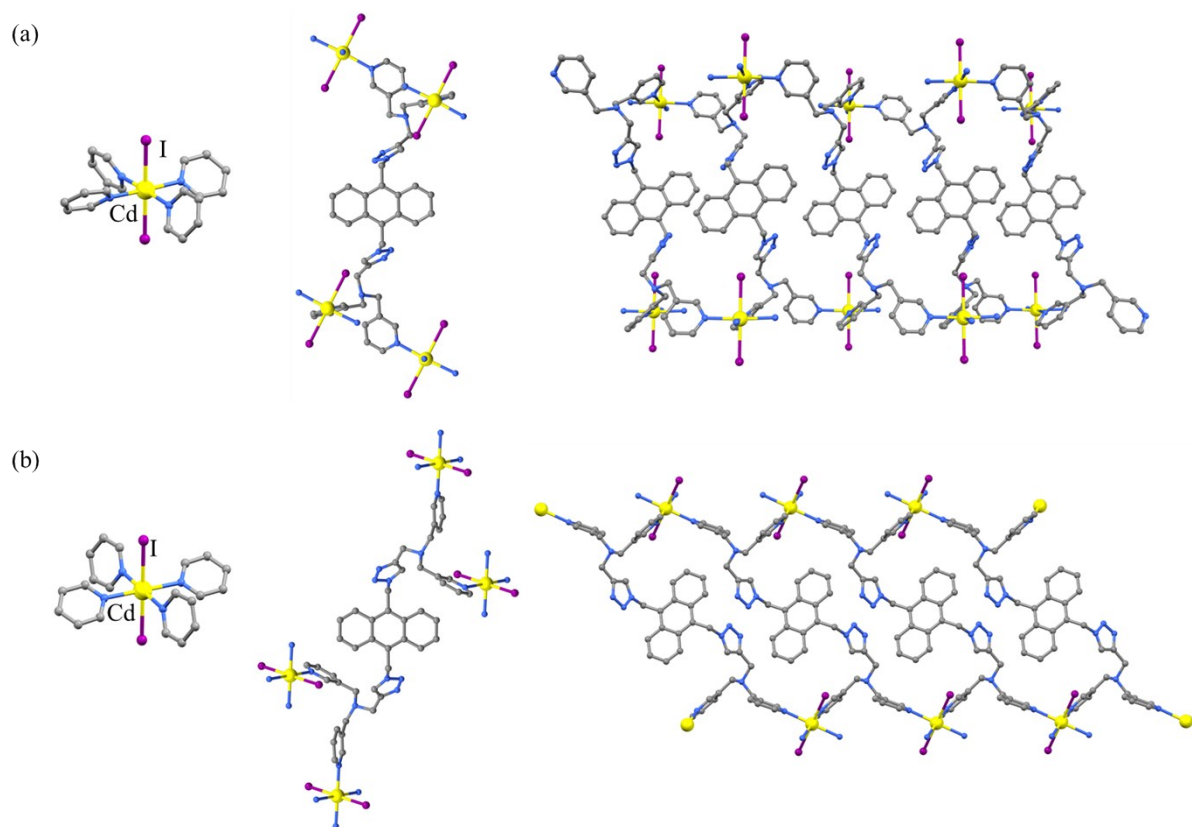

**Fig. S4** Detailed crystal structure for  $3\text{CH}_2\text{Cl}_2 \cdot 2\text{C}_2\text{H}_5\text{OH} @ [\text{CdI}_2\text{L}]$  (a) and  $4\text{C}_4\text{H}_8\text{O} @ [\text{CdI}_2\text{L}]$  (b) showing octahedral geometry around Cd(II) and conformation around ligands.

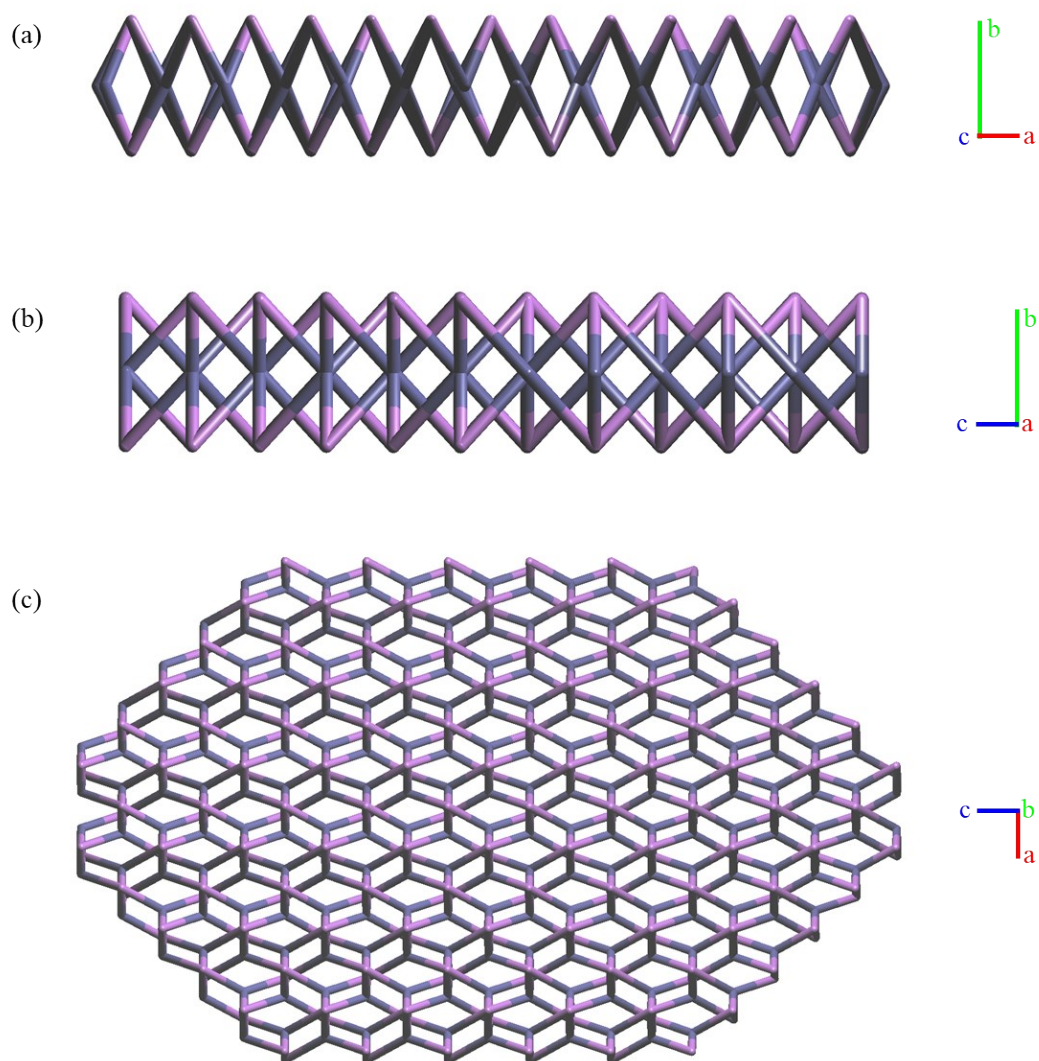

**Fig. S5** Topology(new,  $\{4^3 \cdot 6^2 \cdot 8\}$ ) analysis of  $3\text{CH}_2\text{Cl}_2 \cdot 2\text{C}_2\text{H}_5\text{OH} @ [\text{CdI}_2\text{L}]$ : (a) along c axis, (b) along a axis, and (c) along b axis
